# Supplementary material for: Synthesis, Anti-HCV, Antioxidant and Reduction of Intracellular Reactive Oxygen Species Generation of a Chlorogenic Acid Analogue with an Amide Bond Replacing the Ester Bond
Source: PubMed Central journal article supplement (PMC6273953; doi:10.3390/molecules21060737), 2016-06-08
Supplement: molecules-21-00737-s001.pdf [file molecules-21-00737-s001.pdf]

# Supplementary Materials: Synthesis, Anti-HCV, Antioxidant and Reduction of Intracellular Reactive Oxygen Species Generation of a Chlorogenic Acid Analogue with an Amide Bond Replacing the Ester Bond

Ling-Na Wang, Wei Wang, Masao Hattori, Mohsen Daneshtalab and Chao-Mei Ma

|                                    |     |
|------------------------------------|-----|
| (+) HRESIMS of compound 2          | S2  |
| (+) HRESIMS of compound 3          | S3  |
| (+) HRESIMS of compound 4          | S4  |
| (-) HRESIMS of 4                   | S6  |
| (+) HRESIMS of 5                   | S7  |
| (-) HRESIMS of 5                   | S8  |
| NOE spectrum of 6a                 | S9  |
| NOE spectrum of chlorogenic acid   | S9  |
| <sup>1</sup> H-NMR spectrum of 6a  | S10 |
| <sup>13</sup> C-NMR spectrum of 6a | S10 |
| <sup>1</sup> H-NMR spectrum of 6b  | S11 |
| <sup>13</sup> C-NMR spectrum of 6b | S11 |
| HRFABMS(-) spectrum of 6a          | S12 |

## (+)-HRESIMS of compound 2

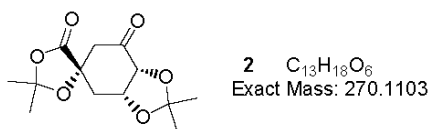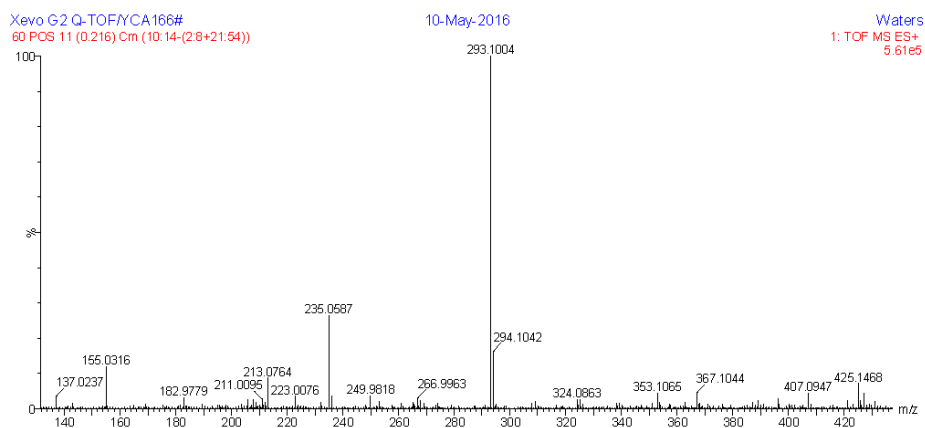Elemental Composition Report of [2+Na]<sup>+</sup>

## Single Mass Analysis

Tolerance = 5.0 PPM / DBE: min = -1.5, max = 50.0

Element prediction: Off

Number of isotope peaks used for i-FIT = 3

Monoisotopic Mass, Even Electron Ions

508 formula(e) evaluated with 2 results within limits (up to 50 closest results for each mass)

Elements Used: C: 0-100 H: 0-200 N: 0-5 O: 0-20 Na: 0-1

Minimum: -1.5

Maximum: 5.0 5.0 50.0

| Mass     | Calc. Mass | mDa | PPM | DBE | i-FIT | Norm  | Conf(%) | Formula                                           |
|----------|------------|-----|-----|-----|-------|-------|---------|---------------------------------------------------|
| 293.1004 | 293.1001   | 0.3 | 1.0 | 4.5 | 223.4 | 0.386 | 67.95   | C <sub>13</sub> H <sub>18</sub> O <sub>6</sub> Na |

## (+)-HRESIMS of compound 3

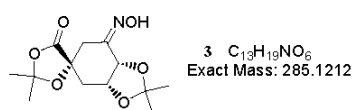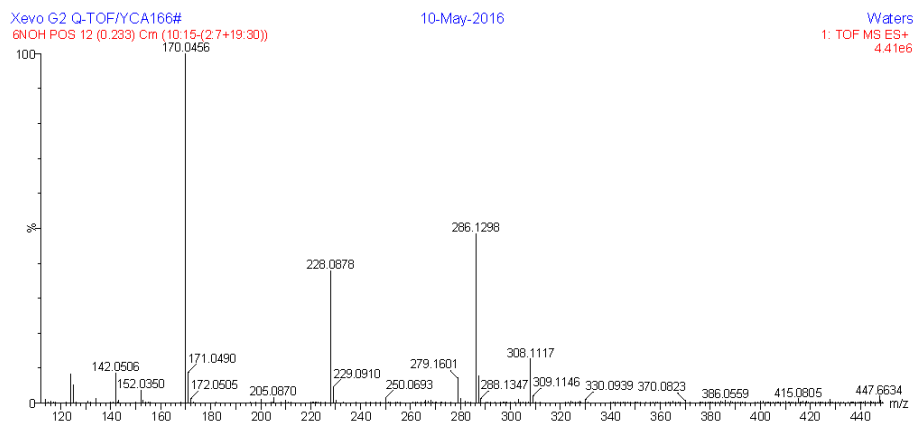Elemental Composition Report of [3+H]<sup>+</sup>

## Single Mass Analysis

Tolerance = 5.0 PPM / DBE: min = -1.5, max = 50.0

Element prediction: Off

Number of isotope peaks used for i-FIT = 3

## Monoisotopic Mass, Even Electron Ions

482 formula(e) evaluated with 2 results within limits (up to 50 closest results for each mass)

Elements Used: C: 0-100 H: 0-200 N: 0-5 O: 0-20 Na: 0-1

Minimum: -1.5

Maximum: 5.0 5.0 50.0

| Mass     | Calc. Mass | mDa | PPM | DBE | i-FIT | Norm  | Conf(%) | Formula                                          |
|----------|------------|-----|-----|-----|-------|-------|---------|--------------------------------------------------|
| 286.1298 | 286.1291   | 0.7 | 2.4 | 4.5 | 342.1 | 0.008 | 99.19   | C <sub>13</sub> H <sub>20</sub> N O <sub>6</sub> |

(+)<sup>1</sup>HRESIMS of compound 4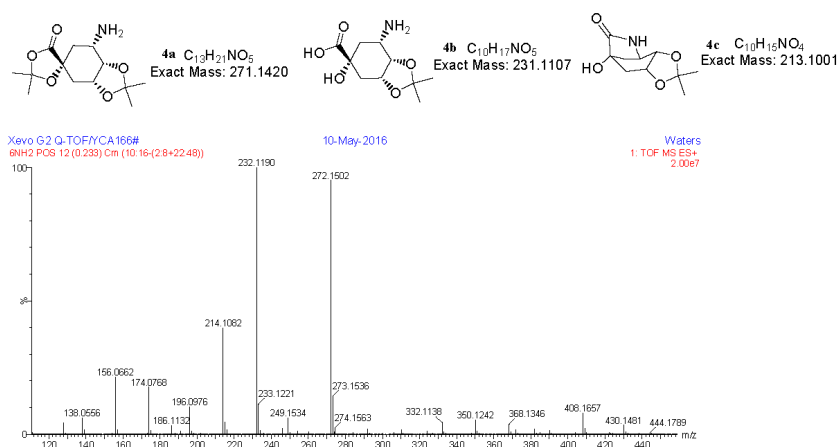Elemental Composition Report of [4a+H]<sup>+</sup>

## Single Mass Analysis

Tolerance = 5.0 PPM / DBE: min = -1.5, max = 50.0

Element prediction: Off

Number of isotope peaks used for i-FIT = 3

Monoisotopic Mass, Even Electron Ions

439 formula(e) evaluated with 2 results within limits (up to 50 closest results for each mass)

Elements Used: C: 0-100 H: 0-200 N: 0-5 O: 0-20 Na: 0-1

Minimum: -1.5

Maximum: 5.0 5.0 50.0

| Mass     | Calc. Mass | mDa | PPM | DBE | i-FIT | Norm  | Conf(%) | Formula      |
|----------|------------|-----|-----|-----|-------|-------|---------|--------------|
| 272.1502 | 272.1498   | 0.4 | 1.5 | 3.5 | 659.7 | 0.003 | 99.71   | C13 H22 N O5 |

Elemental Composition Report of [4b+H]<sup>+</sup>

## Single Mass Analysis

Tolerance = 5.0 PPM / DBE: min = -1.5, max = 50.0

Element prediction: Off

Number of isotope peaks used for i-FIT = 3

Monoisotopic Mass, Even Electron Ions

332 formula(e) evaluated with 2 results within limits (up to 50 closest results for each mass)

Elements Used: C: 0-100 H: 0-200 N: 0-5 O: 0-20 Na: 0-1

Minimum: -1.5

Maximum: 5.0 5.0 50.0

| Mass     | Calc. Mass | mDa | PPM | DBE | i-FIT | Norm  | Conf(%) | Formula      |
|----------|------------|-----|-----|-----|-------|-------|---------|--------------|
| 232.1190 | 232.1185   | 0.5 | 2.2 | 2.5 | 594.8 | 0.002 | 99.83   | C10 H18 N O5 |

Elemental Composition Report of [4c+H]<sup>+</sup>

## Single Mass Analysis

Tolerance = 5.0 PPM / DBE: min = -1.5, max = 50.0

Element prediction: Off

Number of isotope peaks used for i-FIT = 3

Monoisotopic Mass, Even Electron Ions

286 formula(e) evaluated with 2 results within limits (up to 50 closest results for each mass)

Elements Used: C: 0-100 H: 0-200 N: 0-5 O: 0-20 Na: 0-1

Minimum: -1.5

Maximum: 5.0 5.0 50.0

| Mass     | Calc. Mass | mDa | PPM | DBE | i-FIT | Norm  | Conf(%) | Formula                                          |
|----------|------------|-----|-----|-----|-------|-------|---------|--------------------------------------------------|
| 214.1082 | 214.1079   | 0.3 | 1.4 | 3.5 | 577.3 | 0.322 | 72.47   | C <sub>10</sub> H <sub>16</sub> N O <sub>4</sub> |

(-) HRESIMS of 4

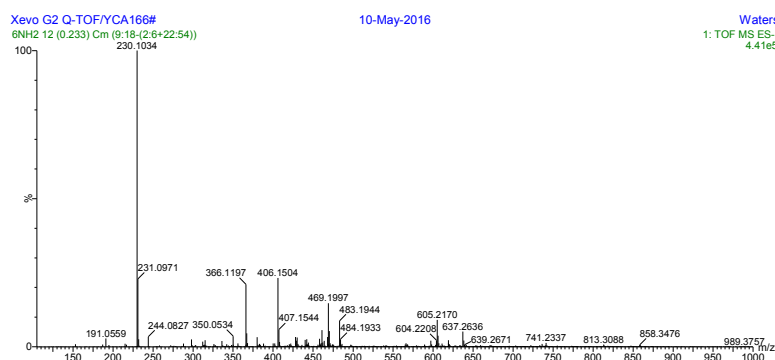

Elemental Composition Report of [4b-H]<sup>-</sup>

Single Mass Analysis

Tolerance = 5.0 PPM / DBE: min = -1.5, max = 50.0

Element prediction: Off

Number of isotope peaks used for i-FIT = 3

Monoisotopic Mass, Even Electron Ions

327 formula(e) evaluated with 2 results within limits (up to 50 closest results for each mass)

Elements Used: C: 0-100 H: 0-200 N: 0-5 O: 0-20 Na: 0-1

Minimum: -1.5

Maximum: 5.0 5.0 50.0

| Mass     | Calc. Mass | mDa | PPM | DBE | i-FIT | Norm  | Conf(%) | Formula                                          |
|----------|------------|-----|-----|-----|-------|-------|---------|--------------------------------------------------|
| 230.1034 | 230.1028   | 0.6 | 2.6 | 3.5 | 190.3 | 1.160 | 31.36   | C <sub>10</sub> H <sub>16</sub> N O <sub>5</sub> |

## (+)-HRESIMS of 5

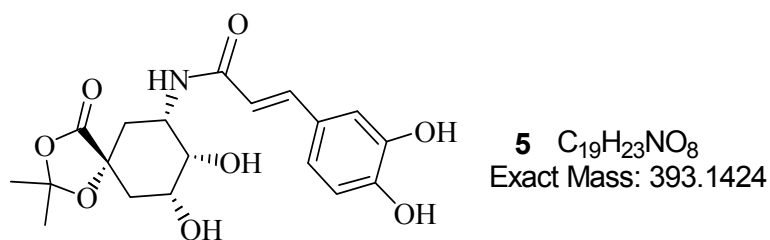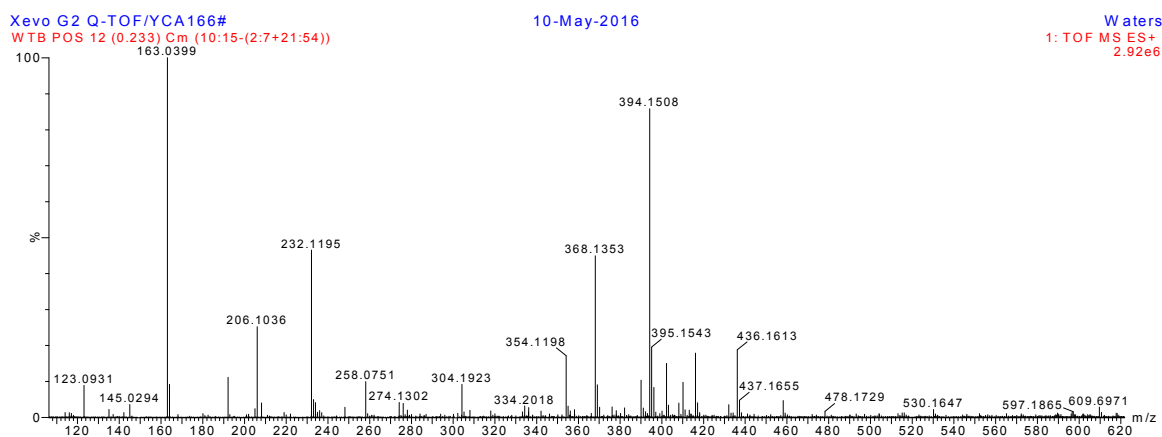Elemental Composition Report of [5+H]<sup>+</sup>

## Single Mass Analysis

Tolerance = 5.0 PPM / DBE: min = -1.5, max = 50.0

Element prediction: Off

Number of isotope peaks used for i-FIT = 3

Monoisotopic Mass, Even Electron Ions

846 formula(e) evaluated with 3 results within limits (up to 50 closest results for each mass)

Elements Used: C: 0-100 H: 0-200 N: 0-5 O: 0-20 Na: 0-1

Minimum: -1.5

Maximum: 5.0 5.0 50.0

| Mass     | Calc. Mass | mDa | PPM | DBE | i-FIT | Norm  | Conf(%) | Formula                                          |
|----------|------------|-----|-----|-----|-------|-------|---------|--------------------------------------------------|
| 394.1508 | 394.1502   | 0.6 | 1.5 | 8.5 | 379.8 | 0.867 | 42.01   | C <sub>19</sub> H <sub>24</sub> N O <sub>8</sub> |

Elemental Composition Report of [5+Na]<sup>+</sup>

## Single Mass Analysis

Tolerance = 5.0 PPM / DBE: min = -1.5, max = 50.0

Element prediction: Off

Number of isotope peaks used for i-FIT = 3

Monoisotopic Mass, Even Electron Ions

915 formula(e) evaluated with 3 results within limits (up to 50 closest results for each mass)

Elements Used: C: 0-100 H: 0-200 N: 0-5 O: 0-20 Na: 0-1

Minimum: -1.5

Maximum: 5.0 5.0 50.0

| Mass     | Calc. Mass | mDa | PPM | DBE | i-FIT | Norm  | Conf(%) | Formula                                             |
|----------|------------|-----|-----|-----|-------|-------|---------|-----------------------------------------------------|
| 416.1327 | 416.1321   | 0.6 | 1.4 | 8.5 | 329.3 | 1.330 | 26.46   | C <sub>19</sub> H <sub>23</sub> N O <sub>8</sub> Na |

## (-) HRESIMS of 5

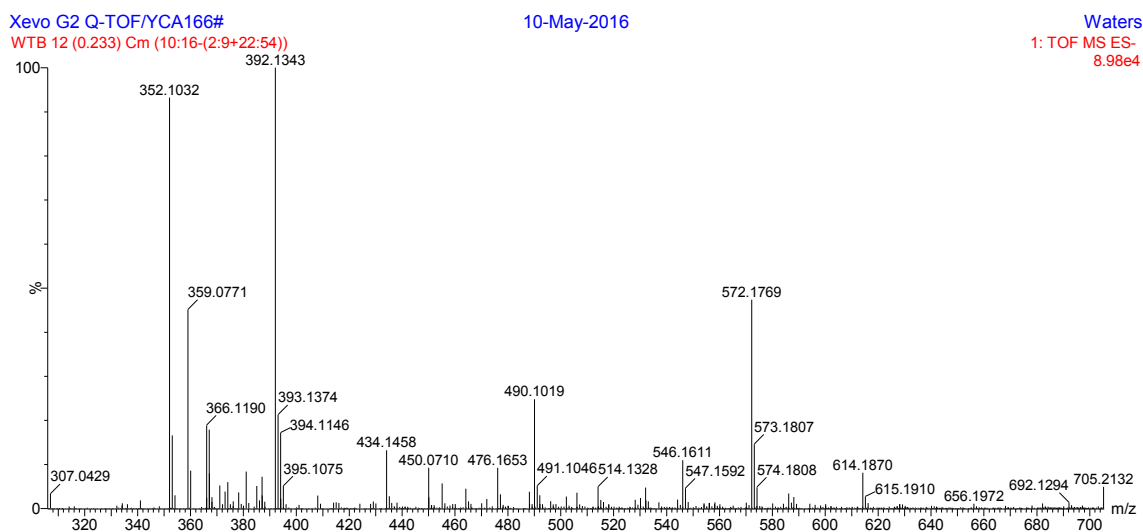Elemental Composition Report of [5-H]<sup>-</sup>

## Single Mass Analysis

Tolerance = 5.0 PPM / DBE: min = -1.5, max = 50.0

Element prediction: Off

Number of isotope peaks used for i-FIT = 3

## Monoisotopic Mass, Even Electron Ions

840 formula(e) evaluated with 3 results within limits (up to 50 closest results for each mass)

Elements Used: C: 0-100 H: 0-200 N: 0-5 O: 0-20 Na: 0-1

Minimum: -1.5

Maximum: 5.0 5.0 50.0

| Mass     | Calc. Mass | mDa  | PPM  | DBE | i-FIT | Norm  | Conf(%) | Formula                                                       |
|----------|------------|------|------|-----|-------|-------|---------|---------------------------------------------------------------|
| 392.1343 | 392.1345   | -0.2 | -0.5 | 9.5 | 154.1 | 2.425 | 8.85    | C <sub>19</sub> H <sub>22</sub> N <sub>1</sub> O <sub>8</sub> |

NOE spectrum of 6a

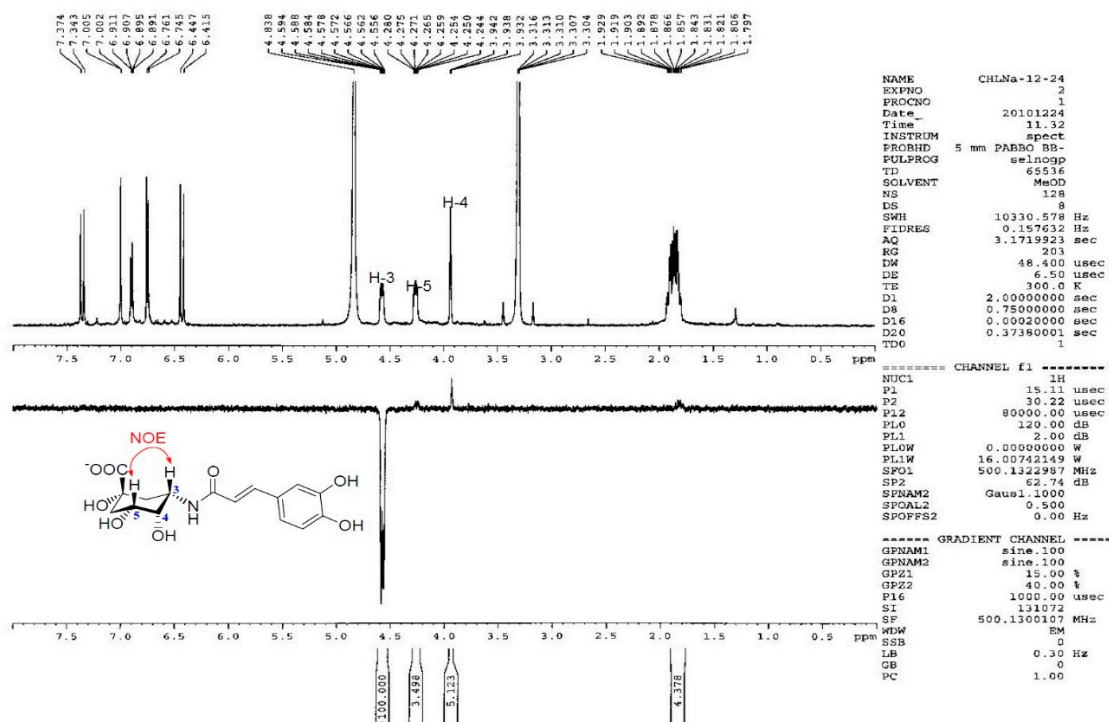

NOE spectrum of chlorogenic acid

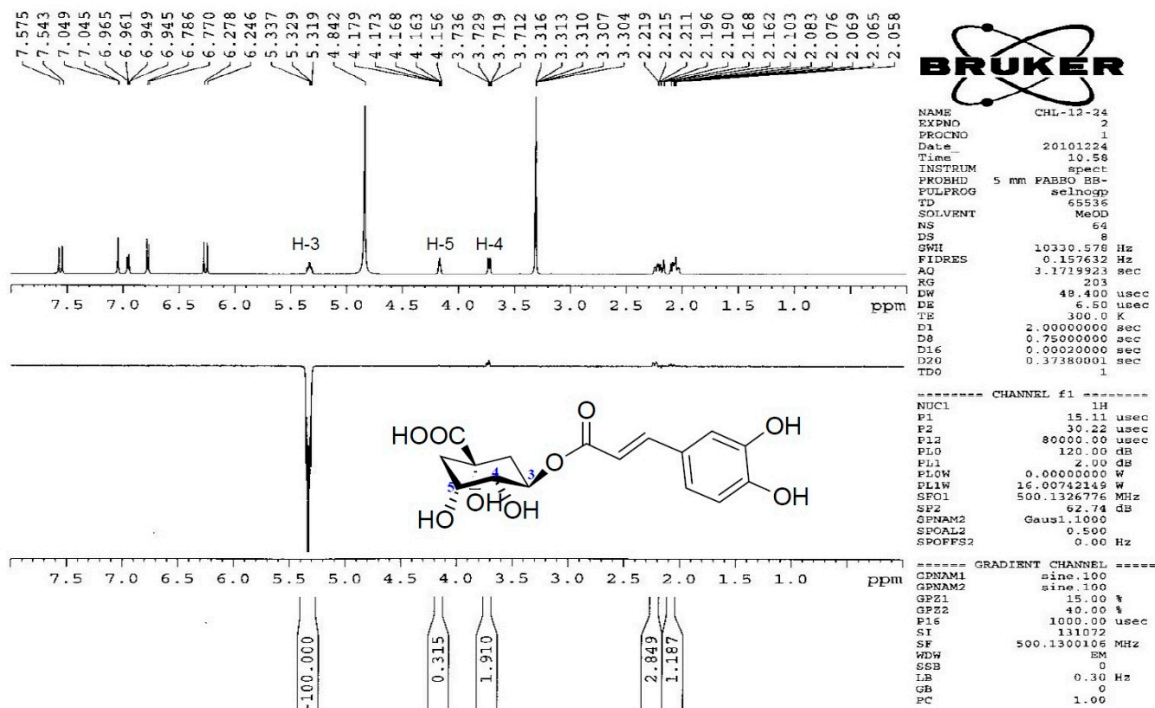



<sup>1</sup>H-NMR spectrum of 6a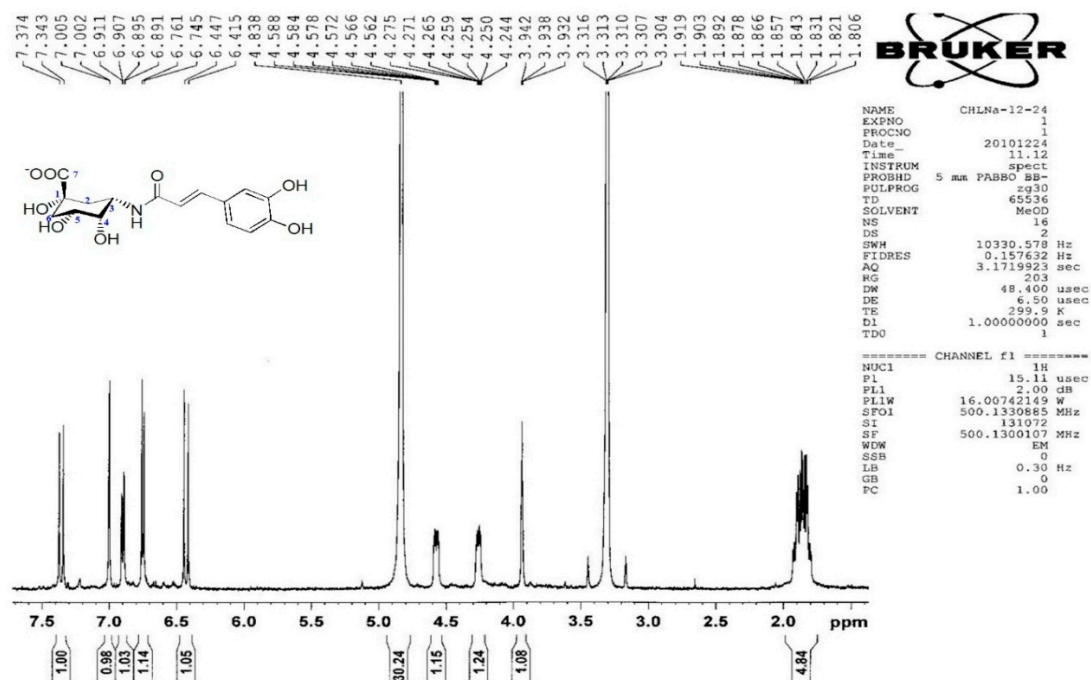<sup>13</sup>C-NMR spectrum of 6a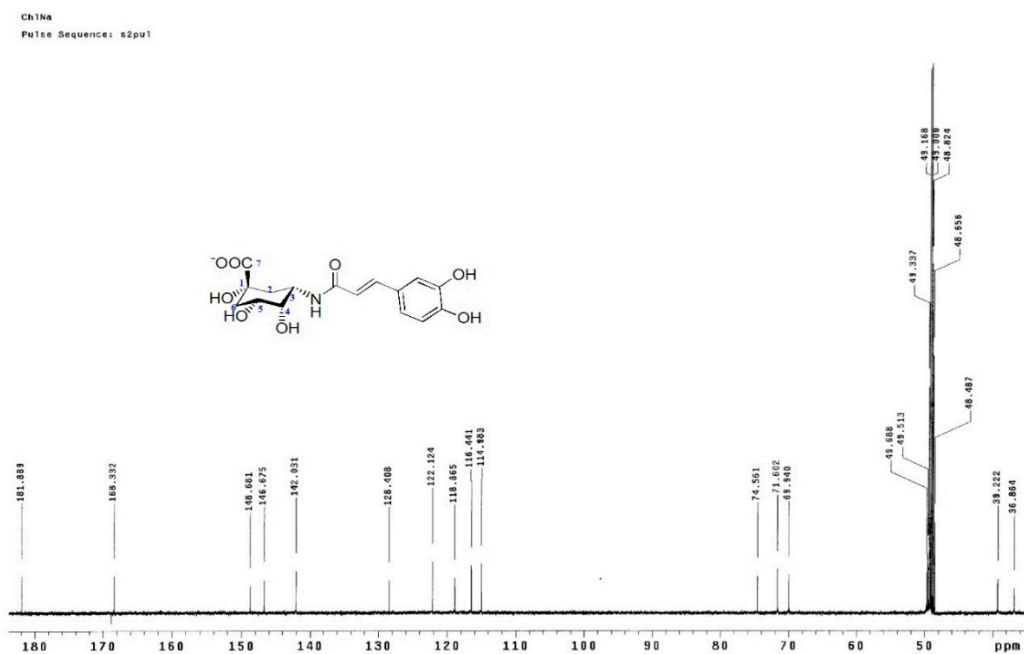

<sup>1</sup>H-NMR spectrum of **6b**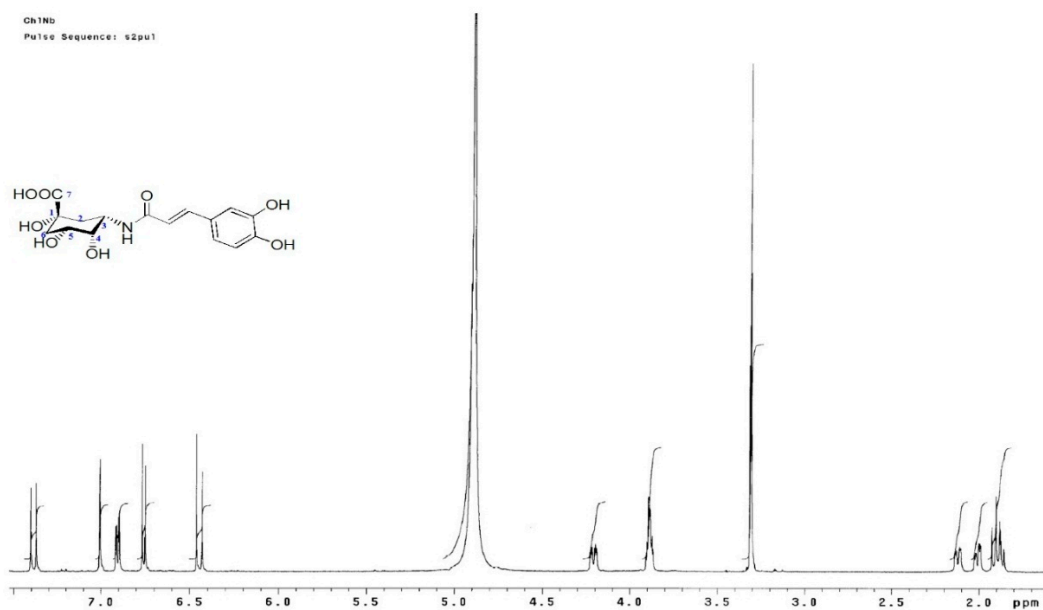<sup>13</sup>C-NMR spectrum of **6b**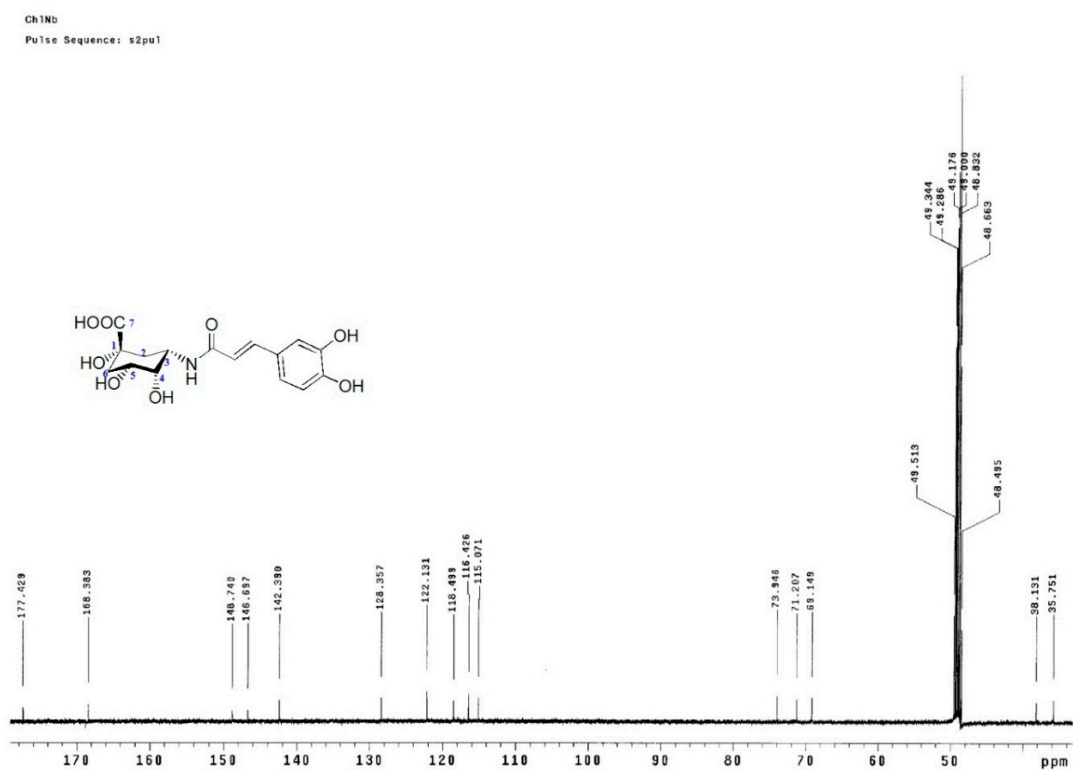

## (-) HRFABMS of 6a

File: ChIN007  
Sample: - -  
Instrument: AX505W  
Inlet: Direct

Date Run: 7-16-2009 (Time Run: 13:16:24)

Ionization mode: FAB-

Scan: 3  
Base: m/z 352; 38.8%FS TIC: 3626674

R.T.: .18

#Ions: 65

Selected Isotopes : H C<sub>0-16</sub> O<sub>0-8</sub> N<sub>0-1</sub>

Error Limit : 20 mmu

Unsaturation Limits : 0 to 50

| <u>Measured Mass</u> | <u>% Base</u> | <u>Formula</u>                                   | <u>Calculated Mass</u> | <u>Error</u> | <u>Unsaturation</u> |
|----------------------|---------------|--------------------------------------------------|------------------------|--------------|---------------------|
| 352.10167            | 100.0%        | C <sub>16</sub> H <sub>18</sub> O <sub>8</sub> N | 352.10322              | -1.6         | 8.5                 |

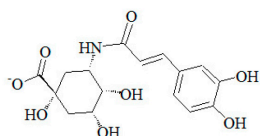

**6a** C<sub>16</sub>H<sub>18</sub>NO<sub>8</sub><sup>-</sup>  
Exact Mass: 352.1032
